# Supplementary material
Source: HighWire-hosted journal article supplement (https://bjo.bmj.com/content/100/10/1443)

### Supplement Figure 1. Cell viability of the ARPE-19 cells and BV2 microglial cells.

ARPE-19 cells and BV2 microglial cells were incubated in different concentrations of bevacizumab for 24, 48 or 72 h under hypoxia. Cell viability was determined using the CCK-8 assay. The data are presented as the means  $\pm$  SEM;  $n = 6$ . \* $P < 0.05$ , \*\* $P < 0.01$ , \*\*\* $P < 0.001$ .

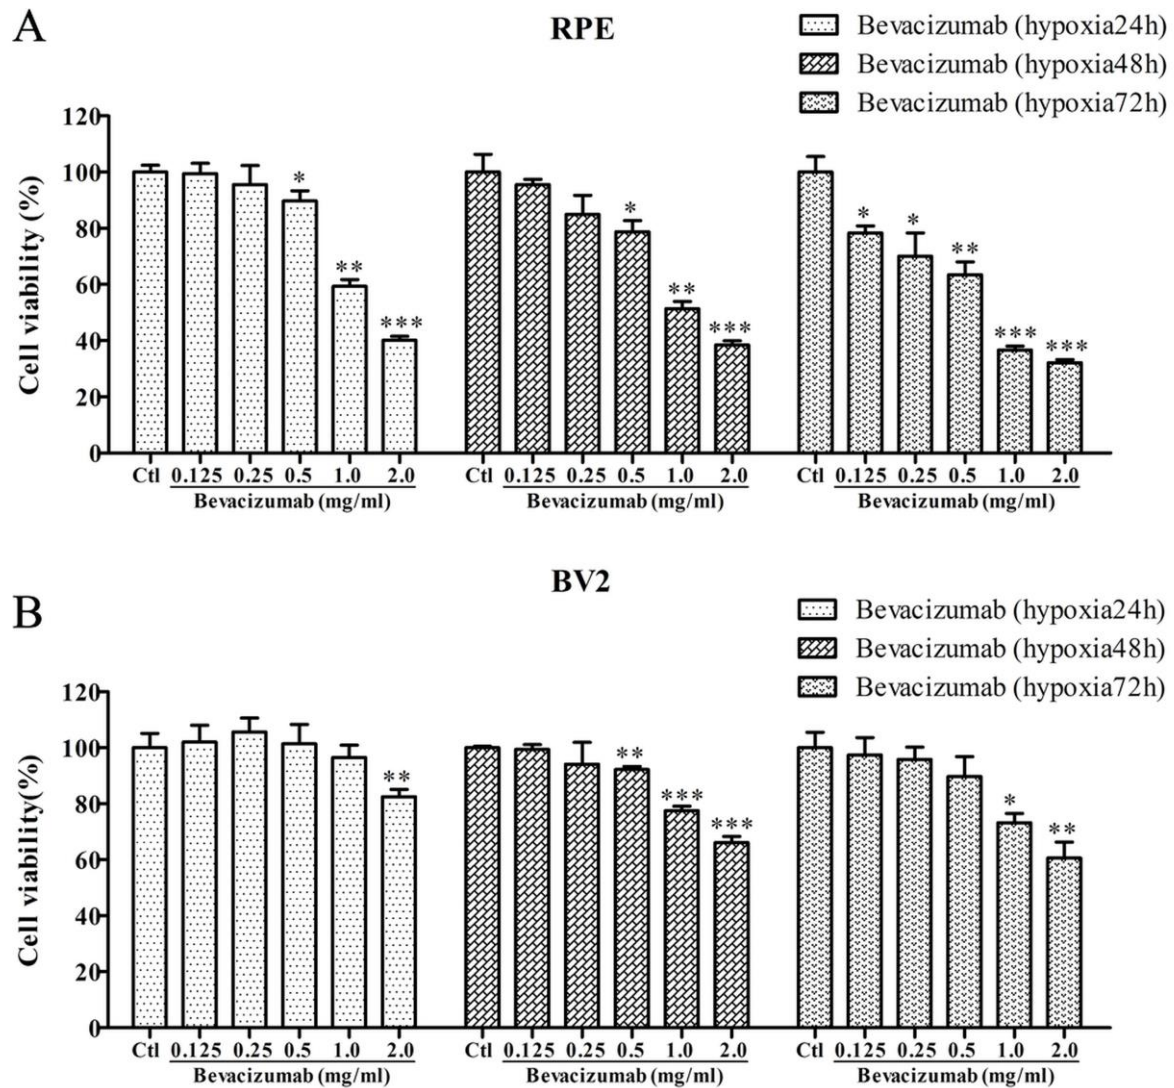

Supplement: inline-supplementary-material-1 [file inline-supplementary-material-1.pdf]
